# Supplementary material for: Preparation of metal oxide thin films from organic-additive-free aqueous solutions by low-speed dip-coating
Source: Royal Society of Chemistry journal article supplement (doi:10.1039/c4ra16810k), 2015-01-01
Supplement: c4ra16810k1.pdf [file c4ra16810k1.pdf]

## Preparation of metal oxide thin films from organic-additive-free aqueous solutions by low-speed dip-coating

H. Uchiyama\*, T. Ito, R. Sasaki and H. Kozuka

E-mail address: [h\\_uchi@kansai-u.ac.jp](mailto:h_uchi@kansai-u.ac.jp) (H. Uchiyama).

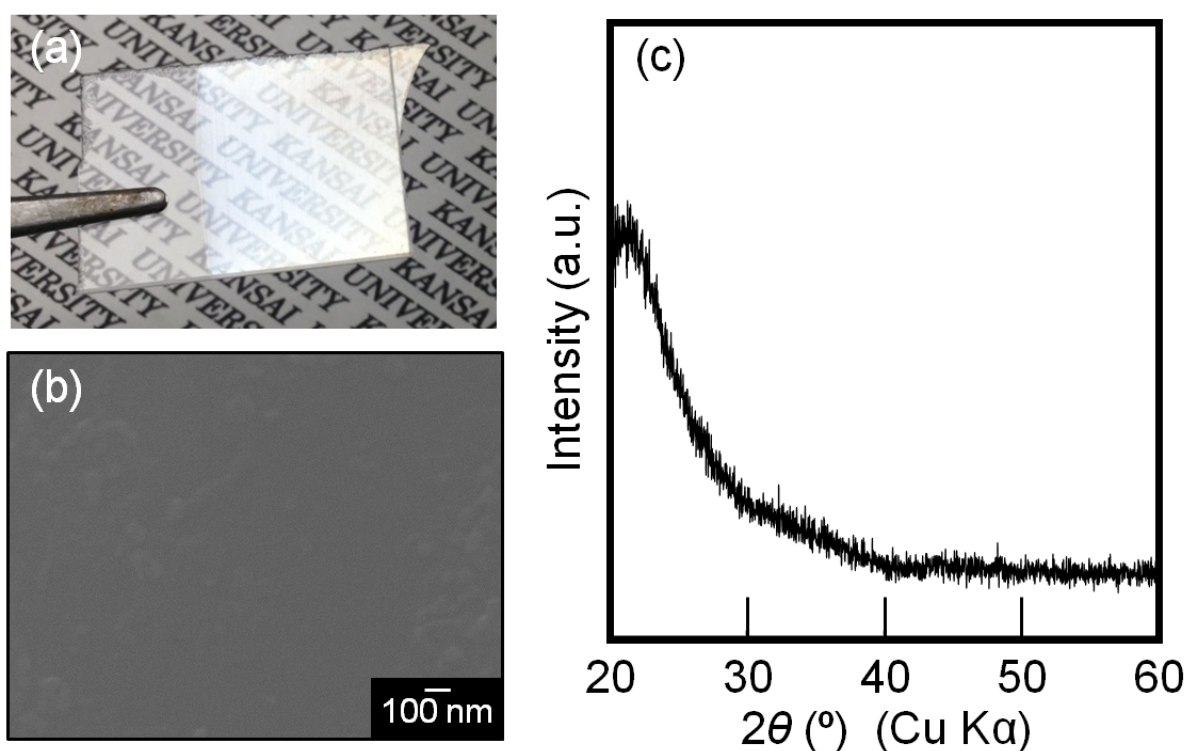

**Fig. S1** Optical micrograph (a), SEM image (b) and XRD pattern of the SnO<sub>2</sub> precursor film prepared with one-time dip-coating at 0.2 cm min<sup>-1</sup> in a thermostatic oven at 60 °C.

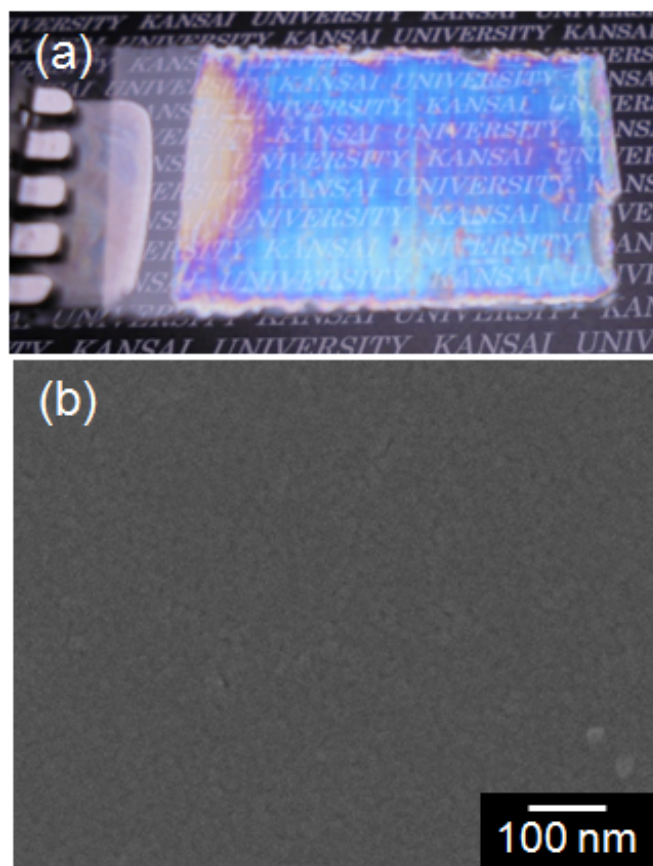

**Fig. S2** Optical micrograph (a) and SEM image (b) of the heat treated  $\text{TiO}_2$  film prepared with one-time dip-coating at  $0.2 \text{ cm min}^{-1}$  in a thermostatic oven at  $40^\circ\text{C}$ .

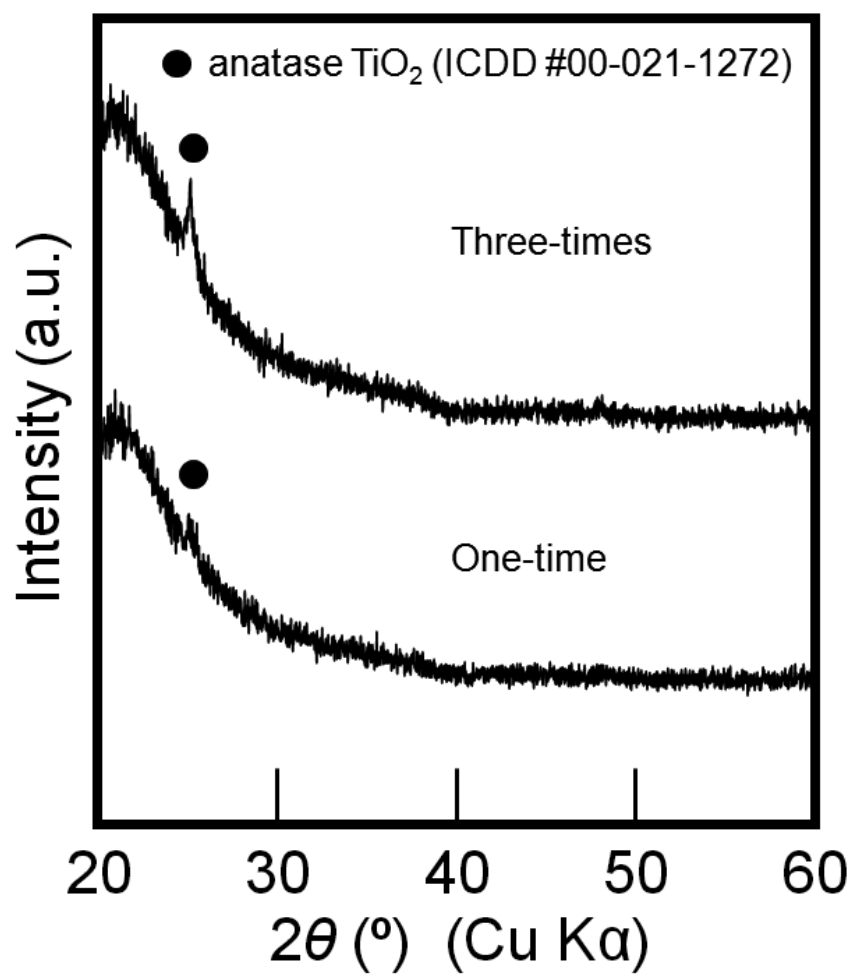

**Fig. S3** XRD patterns of the heat treated TiO<sub>2</sub> film prepared with one- and three-times dip-coating at 0.2 cm min<sup>-1</sup> in a thermostatic oven at 40 °C
